# Supplementary material
Source: PubMed Central journal article supplement (PMC5933308)
Supplement: EHP553.s001.acco.pdf [file EHP553.s001.acco.pdf]

**Note to readers with disabilities:** *EHP* strives to ensure that all journal content is accessible to all readers. However, some figures and Supplemental Material published in *EHP* articles may not conform to [508 standards](#) due to the complexity of the information being presented. If you need assistance accessing journal content, please contact [ehp508@niehs.nih.gov](mailto:ehp508@niehs.nih.gov). Our staff will work with you to assess and meet your accessibility needs within 3 working days.

### **Supplemental Material**

#### **Prenatal and Postnatal PCB-153 and *p,p'*-DDE Exposures and Behavior Scores at 5–9 Years of Age among Children in Greenland and Ukraine**

Aske Hess Rosenquist, Birgit Bjerre Høyer, Jordi Julvez, Jordi Sunyer, Henning Sloth Pedersen, Virissa Lenters, Bo A.G. Jönsson, Jens Peter Bonde, and Gunnar Toft

#### **Table of Contents**

**Table S1.** Crude odds ratios (95% CI) for abnormal behavior scores associated with a doubling of prenatal and postnatal PCB-153 and *p,p'*-DDE.

**Table S2.** Adjusted odds ratios (95% CI) for abnormal SDQ scores associated with a doubling of PCB-153 and *p,p'*-DDE exposures from primary single-pollutant models and mutually-adjusted two-pollutant models.

**Table S3.** Adjusting for breastfeeding: Adjusted odds ratios (95% CI) for abnormal SDQ subscale scores associated with a doubling of prenatal PCB-153 and *p,p'*-DDE.

**Table S4.** Adjusted odds ratios (95% CI) for top 10 percentile cut-off model and primary model of total difficulties scores associated with a doubling of prenatal and postnatal PCB-153 and *p,p'*-DDE.

**Table S5.** Pooled analysis including Poland: Odds ratios (95% CI) for abnormal total difficulties scores associated with a doubling of prenatal and postnatal PCB-153 and *p,p'*-DDE.

**Table S1.** Crude odds ratios (95% CI) for abnormal<sup>a</sup> behavior scores associated with a doubling of prenatal and postnatal PCB-153 and *p,p'*-DDE.

| Outcome                          | Greenland |                   | Ukraine |                   | Pooled <sup>b</sup> |                   |
|----------------------------------|-----------|-------------------|---------|-------------------|---------------------|-------------------|
|                                  | n total   | Crude OR          | n total | Crude OR          | n total             | Crude OR          |
| <b>Prenatal PCB-153</b>          |           |                   |         |                   |                     |                   |
| Total difficulties               | 516       | 0.93 (0.73, 1.19) | 492     | 1.22 (0.80, 1.84) | 1008                | 1.00 (0.81, 1.24) |
| Emotional                        | 518       | 0.89 (0.72, 1.09) | 492     | 1.13 (0.74, 1.72) | 1010                | 0.93 (0.77, 1.12) |
| Conduct                          | 518       | 1.16 (0.96, 1.40) | 492     | 1.32 (0.93, 1.87) | 1010                | 1.19 (1.01, 1.41) |
| Hyperactivity                    | 516       | 1.18 (0.88, 1.58) | 492     | 0.90 (0.59, 1.37) | 1008                | 1.08 (0.85, 1.38) |
| Peer                             | 517       | 1.00 (0.87, 1.15) | 492     | 1.14 (0.87, 1.50) | 1009                | 1.03 (0.91, 1.17) |
| Prosocial                        | 517       | 1.09 (0.91, 1.30) | 492     | 0.88 (0.65, 1.18) | 1009                | 1.03 (0.89, 1.20) |
| <b>Postnatal PCB-153</b>         |           |                   |         |                   |                     |                   |
| Total difficulties               | 482       | 0.77 (0.62, 0.96) | 485     | 0.97 (0.75, 1.26) | 967                 | 0.85 (0.72, 1.00) |
| Emotional                        | 484       | 0.85 (0.71, 1.02) | 485     | 0.94 (0.73, 1.23) | 969                 | 0.88 (0.76, 1.02) |
| Conduct                          | 484       | 0.95 (0.81, 1.13) | 485     | 1.00 (0.81, 1.25) | 969                 | 0.97 (0.85, 1.11) |
| Hyperactivity                    | 482       | 0.85 (0.66, 1.09) | 485     | 0.76 (0.59, 0.99) | 967                 | 0.81 (0.68, 0.97) |
| Peer                             | 483       | 0.96 (0.84, 1.09) | 485     | 1.14 (0.95, 1.36) | 968                 | 1.01 (0.91, 1.12) |
| Prosocial                        | 483       | 1.10 (0.93, 1.30) | 485     | 0.92 (0.76, 1.12) | 968                 | 1.02 (0.90, 1.16) |
| <b>Prenatal <i>p,p'</i>-DDE</b>  |           |                   |         |                   |                     |                   |
| Total difficulties               | 516       | 1.00 (0.79, 1.27) | 492     | 1.41 (0.88, 2.25) | 1008                | 1.07 (0.86, 1.34) |
| Emotional                        | 518       | 0.95 (0.78, 1.16) | 492     | 1.25 (0.77, 2.02) | 1010                | 0.99 (0.82, 1.19) |
| Conduct                          | 518       | 1.22 (1.00, 1.48) | 492     | 1.58 (1.07, 2.33) | 1010                | 1.29 (1.08, 1.54) |
| Hyperactivity                    | 516       | 1.22 (0.91, 1.65) | 492     | 1.40 (0.86, 2.29) | 1008                | 1.27 (0.98, 1.65) |
| Peer                             | 517       | 1.07 (0.93, 1.24) | 492     | 1.30 (0.96, 1.78) | 1009                | 1.11 (0.98, 1.26) |
| Prosocial                        | 517       | 1.16 (0.97, 1.39) | 492     | 0.96 (0.67, 1.38) | 1009                | 1.12 (0.95, 1.31) |
| <b>Postnatal <i>p,p'</i>-DDE</b> |           |                   |         |                   |                     |                   |
| Total difficulties               | 482       | 0.84 (0.68, 1.02) | 485     | 1.00 (0.76, 1.33) | 967                 | 0.89 (0.76, 1.05) |
| Emotional                        | 484       | 0.91 (0.76, 1.08) | 485     | 0.96 (0.73, 1.28) | 969                 | 0.92 (0.80, 1.07) |
| Conduct                          | 484       | 1.00 (0.85, 1.17) | 485     | 1.04 (0.83, 1.32) | 969                 | 1.01 (0.88, 1.16) |
| Hyperactivity                    | 482       | 0.89 (0.70, 1.13) | 485     | 0.85 (0.64, 1.12) | 967                 | 0.87 (0.73, 1.04) |
| Peer                             | 483       | 1.01 (0.89, 1.14) | 485     | 1.19 (0.98, 1.44) | 968                 | 1.06 (0.96, 1.18) |
| Prosocial                        | 483       | 1.17 (0.98, 1.38) | 485     | 0.95 (0.78, 1.17) | 968                 | 1.08 (0.95, 1.23) |

Abbreviations: PCB-153, 2,2',4,4',5,5'-hexachlorobiphenyl; CI, confidence interval; DDE, dichlorodiphenyldichloroethylene; OR, odds ratio; PCB, polychlorinated biphenyls; *p,p'*-DDE, 1,1-dichloro-2,2-bis(*p*-chlorophenyl)-ethylene; SDQ, Strengths and Difficulties Questionnaire.

<sup>a</sup> Total difficulties score: abnormal  $\geq 17$ ; Emotional Symptoms Score: abnormal  $\geq 5$ ; Conduct Problems Score: abnormal  $\geq 4$ ; Hyperactivity Score: abnormal  $\geq 7$ ; Peer Problems Score: abnormal  $\geq 4$ ; Prosocial Behavior Score: abnormal  $\leq 4$ .

<sup>b</sup> Adjusted OR for the pooled cohort is adjusted for country.

**Table S2.** Adjusted<sup>a</sup> odds ratios (95% CI) for abnormal<sup>b</sup> SDQ scores associated with a doubling of PCB-153 and *p,p'*-DDE exposures from primary single-pollutant models and mutually-adjusted two-pollutant models.

| Outcome                          | Greenland         |                   | Ukraine           |                   | Pooled <sup>c</sup> |                   |
|----------------------------------|-------------------|-------------------|-------------------|-------------------|---------------------|-------------------|
|                                  | Single-pollutant  | Two-pollutant     | Single-pollutant  | Two-pollutant     | Single-pollutant    | Two-pollutant     |
| <b>Prenatal PCB-153</b>          |                   |                   |                   |                   |                     |                   |
| Total difficulties               | 1.02 (0.77, 1.36) | 0.78 (0.41, 1.46) | 1.24 (0.77, 1.99) | 1.11 (0.66, 1.85) | 1.09 (0.86, 1.38)   | 0.97 (0.67, 1.39) |
| Emotional                        | 0.88 (0.70, 1.11) | 0.73 (0.44, 1.22) | 1.16 (0.71, 1.90) | 1.09 (0.64, 1.87) | 0.94 (0.76, 1.15)   | 0.89 (0.63, 1.27) |
| Conduct                          | 1.18 (0.96, 1.46) | 0.87 (0.54, 1.41) | 1.32 (0.89, 1.96) | 1.16 (0.76, 1.78) | 1.19 (0.99, 1.42)   | 1.00 (0.74, 1.34) |
| Hyperactivity                    | 1.35 (0.96, 1.89) | 1.17 (0.54, 2.57) | 0.96 (0.60, 1.53) | 0.83 (0.50, 1.38) | 1.24 (0.94, 1.62)   | 0.93 (0.62, 1.38) |
| Peer                             | 1.04 (0.88, 1.22) | 0.75 (0.52, 1.10) | 1.19 (0.88, 1.61) | 1.09 (0.78, 1.51) | 1.05 (0.92, 1.21)   | 0.91 (0.73, 1.15) |
| Prosocial                        | 1.17 (0.94, 1.45) | 0.81 (0.49, 1.34) | 0.83 (0.59, 1.16) | 0.80 (0.55, 1.16) | 1.06 (0.89, 1.26)   | 0.87 (0.66, 1.15) |
| <b>Postnatal PCB-153</b>         |                   |                   |                   |                   |                     |                   |
| Total difficulties               | 0.90 (0.65, 1.25) | 0.54 (0.25, 1.18) | 1.30 (0.81, 2.10) | 1.11 (0.65, 1.91) | 1.06 (0.82, 1.38)   | 0.90 (0.61, 1.33) |
| Emotional                        | 0.87 (0.67, 1.12) | 0.67 (0.39, 1.14) | 1.16 (0.70, 1.91) | 0.94 (0.57, 1.56) | 0.94 (0.75, 1.17)   | 0.84 (0.59, 1.19) |
| Conduct                          | 1.14 (0.91, 1.42) | 0.81 (0.51, 1.29) | 1.24 (0.84, 1.83) | 0.91 (0.61, 1.34) | 1.16 (0.96, 1.41)   | 0.90 (0.68, 1.20) |
| Hyperactivity                    | 1.05 (0.72, 1.53) | 0.86 (0.42, 1.75) | 1.03 (0.64, 1.66) | 0.70 (0.44, 1.11) | 1.08 (0.81, 1.45)   | 0.75 (0.50, 1.11) |
| Peer                             | 1.03 (0.86, 1.22) | 0.75 (0.51, 1.10) | 1.51 (1.11, 2.04) | 1.03 (0.76, 1.39) | 1.12 (0.97, 1.30)   | 0.92 (0.73, 1.15) |
| Prosocial                        | 1.16 (0.92, 1.45) | 0.78 (0.47, 1.31) | 0.88 (0.64, 1.22) | 0.84 (0.59, 1.18) | 1.06 (0.89, 1.28)   | 0.86 (0.65, 1.13) |
| <b>Prenatal <i>p,p'</i>-DDE</b>  |                   |                   |                   |                   |                     |                   |
| Total difficulties               | 1.09 (0.82, 1.45) | 1.37 (0.71, 2.64) | 1.46 (0.87, 2.44) | 1.40 (0.80, 2.44) | 1.15 (0.90, 1.48)   | 1.18 (0.81, 1.74) |
| Emotional                        | 0.94 (0.76, 1.17) | 1.22 (0.74, 1.99) | 1.24 (0.71, 2.15) | 1.19 (0.66, 2.17) | 0.97 (0.79, 1.19)   | 1.06 (0.75, 1.50) |
| Conduct                          | 1.24 (1.00, 1.54) | 1.41 (0.86, 2.33) | 1.58 (1.02, 2.44) | 1.49 (0.93, 2.39) | 1.25 (1.04, 1.51)   | 1.25 (0.92, 1.70) |
| Hyperactivity                    | 1.36 (0.95, 1.94) | 1.17 (0.52, 2.62) | 1.42 (0.84, 2.40) | 1.53 (0.88, 2.66) | 1.43 (1.06, 1.92)   | 1.51 (0.99, 2.32) |
| Peer                             | 1.11 (0.94, 1.30) | 1.43 (0.97, 2.09) | 1.36 (0.96, 1.91) | 1.31 (0.90, 1.90) | 1.12 (0.97, 1.29)   | 1.20 (0.95, 1.52) |
| Prosocial                        | 1.24 (1.00, 1.54) | 1.50 (0.89, 2.53) | 0.99 (0.66, 1.47) | 1.09 (0.71, 1.68) | 1.16 (0.97, 1.39)   | 1.30 (0.98, 1.73) |
| <b>Postnatal <i>p,p'</i>-DDE</b> |                   |                   |                   |                   |                     |                   |
| Total difficulties               | 1.02 (0.74, 1.41) | 1.79 (0.78, 4.08) | 1.51 (0.93, 2.45) | 1.44 (0.84, 2.48) | 1.16 (0.88, 1.52)   | 1.25 (0.83, 1.87) |
| Emotional                        | 0.97 (0.76, 1.23) | 1.32 (0.79, 2.23) | 1.23 (0.73, 2.08) | 1.02 (0.60, 1.71) | 1.00 (0.80, 1.25)   | 1.09 (0.77, 1.53) |
| Conduct                          | 1.21 (0.96, 1.52) | 1.25 (0.79, 1.99) | 1.42 (0.93, 2.18) | 1.05 (0.70, 1.58) | 1.24 (1.01, 1.51)   | 1.10 (0.82, 1.46) |
| Hyperactivity                    | 1.11 (0.76, 1.60) | 0.99 (0.50, 1.96) | 1.50 (0.90, 2.52) | 1.10 (0.68, 1.79) | 1.27 (0.93, 1.73)   | 1.11 (0.75, 1.64) |
| Peer                             | 1.10 (0.93, 1.31) | 1.37 (0.94, 2.00) | 1.79 (1.28, 2.50) | 1.18 (0.85, 1.62) | 1.20 (1.03, 1.40)   | 1.17 (0.93, 1.47) |
| Prosocial                        | 1.28 (1.01, 1.61) | 1.57 (0.93, 2.64) | 1.03 (0.70, 1.49) | 1.12 (0.78, 1.60) | 1.20 (0.99, 1.45)   | 1.27 (0.97, 1.68) |

Abbreviations: PCB-153, 2,2',4,4',5,5'-hexachlorobiphenyl; CI, confidence interval; DDE, dichlorodiphenyldichloroethylene; OR, odds ratio; PCB, polychlorinated biphenyls; *p,p'*-DDE, 1,1-dichloro-2,2-bis(*p*-chlorophenyl)-ethylene; SDQ, Strengths and Difficulties Questionnaire.

<sup>a</sup> Adjusted for maternal age, maternal smoking during pregnancy, child's sex, and child's age at follow-up. Estimated postnatal PCB-153 and *p,p'*-DDE are additionally adjusted for breastfeeding duration.

<sup>b</sup> Total difficulties score: abnormal  $\geq 17$ ; Emotional Symptoms Score: abnormal  $\geq 5$ ; Conduct Problems Score: abnormal  $\geq 4$ ; Hyperactivity Score: abnormal  $\geq 7$ ; Peer Problems Score: abnormal  $\geq 4$ ; Prosocial Behavior Score: abnormal  $\leq 4$ .

<sup>c</sup> Adjusted OR for the pooled cohort is adjusted for country.

**Table S3.** Adjusting for breastfeeding: Adjusted<sup>a</sup> odds ratios (95% CI) for abnormal<sup>b</sup> SDQ subscale scores associated with a doubling of prenatal PCB-153 and *p,p'*-DDE.

| Outcome                | Greenland         |                   |                   |                            | Ukraine           |                   |                   |                            | Pooled <sup>c</sup> |                   |                   |                            |
|------------------------|-------------------|-------------------|-------------------|----------------------------|-------------------|-------------------|-------------------|----------------------------|---------------------|-------------------|-------------------|----------------------------|
|                        | n total / n cases | Primary model     | n total / n cases | Adjusted for breastfeeding | n total / n cases | Primary model     | n total / n cases | Adjusted for breastfeeding | n total / n cases   | Primary model     | n total / n cases | Adjusted for breastfeeding |
| <b>PCB-153</b>         |                   |                   |                   |                            |                   |                   |                   |                            |                     |                   |                   |                            |
| Total difficulties     | 452 / 26          | 1.02 (0.77, 1.36) | 412 / 19          | 0.86 (0.61, 1.20)          | 456 / 25          | 1.24 (0.77, 1.99) | 453 / 25          | 1.25 (0.76, 2.03)          | 908 / 51            | 1.09 (0.86, 1.38) | 865 / 44          | 1.01 (0.78, 1.31)          |
| Emotional              | 454 / 37          | 0.88 (0.70, 1.11) | 414 / 31          | 0.87 (0.67, 1.14)          | 456 / 23          | 1.16 (0.71, 1.90) | 453 / 23          | 1.15 (0.69, 1.94)          | 910 / 60            | 0.94 (0.76, 1.15) | 867 / 54          | 0.95 (0.76, 1.20)          |
| Conduct                | 454 / 54          | 1.18 (0.96, 1.46) | 414 / 46          | 1.11 (0.88, 1.40)          | 456 / 37          | 1.32 (0.89, 1.96) | 453 / 37          | 1.32 (0.88, 2.00)          | 910 / 91            | 1.19 (0.99, 1.42) | 867 / 83          | 1.14 (0.94, 1.38)          |
| Hyperactivity          | 452 / 19          | 1.35 (0.96, 1.89) | 412 / 15          | 1.06 (0.72, 1.55)          | 456 / 22          | 0.96 (0.60, 1.53) | 453 / 22          | 0.90 (0.56, 1.44)          | 908 / 41            | 1.24 (0.94, 1.62) | 865 / 37          | 1.04 (0.78, 1.39)          |
| Peer                   | 453 / 92          | 1.04 (0.88, 1.22) | 413 / 81          | 1.00 (0.84, 1.19)          | 456 / 66          | 1.19 (0.88, 1.61) | 453 / 66          | 1.19 (0.88, 1.61)          | 909 / 158           | 1.05 (0.92, 1.21) | 866 / 147         | 1.03 (0.89, 1.19)          |
| Prosocial              | 453 / 51          | 1.17 (0.94, 1.45) | 413 / 43          | 1.11 (0.88, 1.39)          | 456 / 47          | 0.83 (0.59, 1.16) | 453 / 47          | 0.82 (0.58, 1.15)          | 908 / 98            | 1.06 (0.89, 1.26) | 866 / 90          | 1.01 (0.84, 1.21)          |
| <b><i>p,p'</i>-DDE</b> |                   |                   |                   |                            |                   |                   |                   |                            |                     |                   |                   |                            |
| Total difficulties     | 452 / 26          | 1.09 (0.82, 1.45) | 412 / 19          | 0.98 (0.71, 1.37)          | 456 / 25          | 1.46 (0.87, 2.44) | 453 / 25          | 1.43 (0.86, 2.37)          | 908 / 51            | 1.15 (0.90, 1.48) | 865 / 44          | 1.09 (0.83, 1.43)          |
| Emotional              | 454 / 37          | 0.94 (0.76, 1.17) | 414 / 31          | 0.98 (0.76, 1.25)          | 456 / 23          | 1.24 (0.71, 2.15) | 453 / 23          | 1.20 (0.69, 2.09)          | 910 / 60            | 0.97 (0.79, 1.19) | 867 / 54          | 1.01 (0.81, 1.27)          |
| Conduct                | 454 / 54          | 1.24 (1.00, 1.54) | 414 / 46          | 1.19 (0.94, 1.49)          | 456 / 37          | 1.58 (1.02, 2.44) | 453 / 37          | 1.54 (0.98, 2.41)          | 910 / 91            | 1.25 (1.04, 1.51) | 867 / 83          | 1.20 (0.99, 1.47)          |
| Hyperactivity          | 452 / 19          | 1.36 (0.95, 1.94) | 412 / 15          | 1.11 (0.76, 1.63)          | 456 / 22          | 1.42 (0.84, 2.40) | 453 / 22          | 1.35 (0.80, 2.30)          | 908 / 41            | 1.43 (1.06, 1.92) | 865 / 37          | 1.23 (0.91, 1.67)          |
| Peer                   | 453 / 92          | 1.11 (0.94, 1.30) | 413 / 81          | 1.08 (0.91, 1.28)          | 456 / 66          | 1.36 (0.96, 1.91) | 453 / 66          | 1.37 (0.97, 1.93)          | 909 / 158           | 1.12 (0.97, 1.29) | 866 / 147         | 1.10 (0.95, 1.28)          |
| Prosocial              | 453 / 51          | 1.24 (1.00, 1.54) | 413 / 43          | 1.22 (0.96, 1.55)          | 456 / 47          | 0.99 (0.66, 1.47) | 453 / 47          | 0.98 (0.66, 1.46)          | 908 / 98            | 1.16 (0.97, 1.39) | 866 / 90          | 1.14 (0.94, 1.39)          |

Abbreviations: PCB-153, 2,2',4,4',5,5'-hexachlorobiphenyl; CI, confidence interval; DDE, dichlorodiphenyldichloroethylene; OR, odds ratio; PCB, polychlorinated biphenyls; *p,p'*-DDE, 1,1-dichloro-2,2-bis(*p*-chlorophenyl)-ethylene; SDQ, Strengths and Difficulties Questionnaire.

<sup>a</sup> Adjusted for maternal age, maternal smoking during pregnancy, child's sex, and child's age at follow-up.

<sup>b</sup> Emotional Symptoms Score: abnormal  $\geq 5$ ; Conduct Problems Score: abnormal  $\geq 4$ ; Hyperactivity Score: abnormal  $\geq 7$ ; Peer Problems Score: abnormal  $\geq 4$ ; Prosocial Behavior Score: abnormal  $\leq 4$ .

<sup>c</sup> Adjusted OR for the pooled cohort is adjusted for country.

**Table S4.** Adjusted<sup>a</sup> odds ratios (95% CI) for top 10 percentile cut-off model and primary model of total difficulties scores associated with a doubling of prenatal and postnatal PCB-153 and *p,p'*-DDE.

|                                      | <b>Greenland</b>     |                   |                      |                                     | <b>Ukraine</b>       |                   |                      |                                     | <b>Pooled<sup>b</sup></b> |                   |                      |                                     |
|--------------------------------------|----------------------|-------------------|----------------------|-------------------------------------|----------------------|-------------------|----------------------|-------------------------------------|---------------------------|-------------------|----------------------|-------------------------------------|
|                                      | n total /<br>n cases | Primary model     | n total /<br>n cases | 10 percentile<br>model <sup>b</sup> | n total /<br>n cases | Primary model     | n total /<br>n cases | 10 percentile<br>model <sup>b</sup> | n total /<br>n cases      | Primary model     | n total /<br>n cases | 10 percentile<br>model <sup>b</sup> |
| Prenatal PCB-153                     | 452 / 26             | 1.02 (0.77, 1.36) | 442 / 43             | 1.12 (0.90, 1.41)                   | 456 / 25             | 1.24 (0.77, 1.99) | 456 / 45             | 1.02 (0.72, 1.43)                   | 908 / 51                  | 1.09 (0.86, 1.38) | 898 / 88             | 1.10 (0.91, 1.32)                   |
| Estimated postnatal PCB-153          | 412 / 19             | 0.90 (0.65, 1.25) | 417 / 34             | 1.05 (0.81, 1.36)                   | 449 / 24             | 1.30 (0.81, 2.10) | 450 / 44             | 1.10 (0.78, 1.55)                   | 861 / 43                  | 1.06 (0.82, 1.38) | 867 / 78             | 1.09 (0.89, 1.33)                   |
| Prenatal <i>p,p'</i> -DDE            | 452 / 26             | 1.09 (0.82, 1.45) | 442 / 43             | 1.20 (0.95, 1.52)                   | 456 / 25             | 1.46 (0.87, 2.44) | 456 / 45             | 1.06 (0.70, 1.58)                   | 908 / 51                  | 1.15 (0.90, 1.48) | 898 / 88             | 1.16 (0.95, 1.40)                   |
| Estimated postnatal <i>p,p'</i> -DDE | 412 / 19             | 1.02 (0.74, 1.41) | 417 / 34             | 1.18 (0.91, 1.54)                   | 449 / 24             | 1.51 (0.93, 2.45) | 450 / 44             | 1.19 (0.81, 1.74)                   | 861 / 43                  | 1.16 (0.88, 1.52) | 867 / 78             | 1.19 (0.96, 1.47)                   |

Abbreviations: PCB-153, 2,2',4,4',5,5'-hexachlorobiphenyl; CI, confidence interval; DDE, dichlorodiphenyldichloroethylene; OR, odds ratio; PCB, polychlorinated biphenyls; *p,p'*-DDE, 1,1-dichloro-2,2-bis(*p*-chlorophenyl)-ethylene; SDQ, Strengths and Difficulties Questionnaire.

<sup>a</sup> Adjusted for maternal age, maternal smoking during pregnancy, child's sex, and child's age at follow-up. Estimated postnatal PCB-153 and *p,p'*-DDE are additionally adjusted for breastfeeding duration.

<sup>b</sup> Crude and adjusted OR for the pooled cohort is adjusted for country.

**Table S5.** Pooled analysis including Poland: Odds ratios (95% CI) for abnormal<sup>a</sup> total difficulties scores associated with a doubling of prenatal and postnatal PCB-153 and *p,p'*-DDE.

|                                      | <b>Pooled<sup>a</sup></b> |                   | n total | Adjusted OR <sup>c</sup> |
|--------------------------------------|---------------------------|-------------------|---------|--------------------------|
|                                      | n total                   | Crude OR          |         |                          |
| Prenatal PCB-153                     | 1098                      | 1.06 (0.86, 1.31) | 994     | 1.15 (0.92, 1.45)        |
| Prenatal <i>p,p'</i> -DDE            | 1098                      | 1.11 (0.89, 1.38) | 994     | 1.17 (0.92, 1.50)        |
| Estimated postnatal PCB-153          | 1036                      | 0.87 (0.74, 1.03) | 927     | 1.15 (0.89, 1.49)        |
| Estimated postnatal <i>p,p'</i> -DDE | 1036                      | 0.90 (0.76, 1.05) | 927     | 1.20 (0.92, 1.57)        |

Abbreviations: PCB-153, 2,2',4,4',5,5'-hexachlorobiphenyl; CI, confidence interval; DDE, dichlorodiphenyldichloroethylene; OR, odds ratio; PCB, polychlorinated biphenyls; *p,p'*-DDE, 1,1-dichloro-2,2-bis(*p*-chlorophenyl)-ethylene; SDQ, Strengths and Difficulties Questionnaire.

<sup>a</sup> Total difficulties Score: abnormal  $\geq 17$ .

<sup>b</sup> Crude and adjusted OR for the pooled cohort is adjusted for country.

<sup>c</sup> Adjusted for maternal age, maternal smoking during pregnancy, child's sex, and child's age at follow-up. Estimated postnatal PCB-153 and *p,p'*-DDE are additionally adjusted for breastfeeding duration.
